# Supplementary material
Source: HighWire-hosted journal article supplement (https://bmjopen.bmj.com/content/10/5/e036981)
Supplement: inline-supplementary-material-1 [file inline-supplementary-material-1.pdf]

## Supplementary Material

**Supplementary Table 1.** Primary & secondary outcomes to be extracted/ requested for included studies

|                                                                                                                                                                                                                                                                                                                                                                                                                                                                                                                                                                                                                                                                                                                                                                                                                                                                                                                                                                                                                                                                                                        |
|--------------------------------------------------------------------------------------------------------------------------------------------------------------------------------------------------------------------------------------------------------------------------------------------------------------------------------------------------------------------------------------------------------------------------------------------------------------------------------------------------------------------------------------------------------------------------------------------------------------------------------------------------------------------------------------------------------------------------------------------------------------------------------------------------------------------------------------------------------------------------------------------------------------------------------------------------------------------------------------------------------------------------------------------------------------------------------------------------------|
| <ul style="list-style-type: none"><li>• Maternal / birth outcomes<ul style="list-style-type: none"><li>○ <b>Primary:</b> maternal glycaemic control (glucose, insulin, and glycosylated haemoglobin [HbA1c], and incidence of hyper/hypoglycaemia) + incidence of GDM in women without GDM</li><li>○ gestational weight gain</li><li>○ preterm birth (iatrogenic or spontaneous)</li><li>○ pregnancy-induced hypertension, pre-eclampsia, and eclampsia</li><li>○ mode of birth (spontaneous vaginal, instrumental, caesarean section)</li><li>○ maternal satisfaction with experience of pregnancy and birth</li><li>○ maternal death</li><li>○ maternal obstetric complications (haemorrhage, infection, thrombosis, admission to intensive care unit, incontinence, perineal trauma)</li><li>○ maternal adverse events or side effects (gastrointestinal disturbance, vomiting)</li><li>○ maternal diabetic complications: diabetic ketoacidosis (DKA), retinopathy, nephropathy, macrovascular disease</li><li>○ development of type 2 diabetes during pregnancy or postpartum</li></ul></li></ul> |
| <ul style="list-style-type: none"><li>• Neonatal outcomes<ul style="list-style-type: none"><li>○ <b>Primary:</b> hypoglycaemia, birthweight (and birthweight centile), birth length, head circumference, and gestational age at delivery</li><li>○ cord-blood insulin, glucose, and C-peptide</li><li>○ miscarriage, stillbirth, neonatal or infant death</li><li>○ congenital malformation</li><li>○ macrosomia, small for gestational age (SGA), low birthweight</li><li>○ shoulder dystocia, birth trauma (bone fracture, nerve palsy)</li><li>○ admission and length of stay at different levels of care including neonatal intensive care unit, high-dependency unit, special care unit or transitional care unit</li><li>○ Apgar score &lt;7 at 5 min</li><li>○ respiratory distress, sepsis, transient heart failure, resuscitation, jaundice, hypocalcaemia, polycythaemia, hypoxic ischaemic encephalopathy, impairment of neurodevelopment.</li><li>○ long term infant child outcomes (neurodevelopment/ cognitive, anthropometric, etc)</li></ul></li></ul>                                 |

**Supplementary Table 2.** Sample search strategy for OVID Medline

|                                     |                                                     |
|-------------------------------------|-----------------------------------------------------|
| 1. metformin/                       | 51. randomly.ti,ab.                                 |
| 2. metformin.mp.                    | 52. trial.ti.                                       |
| 3. metformin hydrochloride.mp.      | 53. or/46-52                                        |
| 4. metformin HCL.mp.                | 54. exp animals/ not exp humans/                    |
| 5. hypoglycemic?.mp.                | 55. 53 not 54                                       |
| 6. hypoglycaemic?.mp.               | 56. Meta-Analysis as Topic/                         |
| 7. anti?diabetic?.mp.               | 57. meta analy\$.tw.                                |
| 8. antihyperglycemic?.mp.           | 58. metaanaly\$.tw.                                 |
| 9. antihyperglycaemic?.mp.          | 59. Meta-Analysis/                                  |
| 10. glucose?lowering.mp.            | 60. (systematic adj (review\$1 or overview\$1)).tw. |
| 11. dimethylbiguanidine.mp.         | 61. exp Review Literature as Topic/                 |
| 12. dimethylguanylguanidine.mp.     | 62. or/56-61                                        |
| 13. glucophage.mp.                  | 63. cochrane.ab.                                    |
| 14. biguanide?.mp.                  | 64. embase.ab.                                      |
| 15. buformin.mp.                    | 65. (psychlit or psyclit).ab.                       |
| 16. phenformin.mp.                  | 66. (psychinfo or psycinfo).ab.                     |
| 17. sitagliptin.mp.                 | 67. (cinahl or cinhal).ab.                          |
| 18. glumetza.mp.                    | 68. science citation index.ab.                      |
| 19. carbophage.mp.                  | 69. bids.ab.                                        |
| 20. obimet.mp.                      | 70. cancerlit.ab.                                   |
| 21. glufornin.mp.                   | 71. or/63-70                                        |
| 22. dianben.mp.                     | 72. reference list\$.ab.                            |
| 23. diabex.mp.                      | 73. bibliograph\$.ab.                               |
| 24. diaformin.mp.                   | 74. hand-search\$.ab.                               |
| 25. siofor.mp.                      | 75. relevant journals.ab.                           |
| 26. metfogamma.mp.                  | 76. manual search\$.ab.                             |
| 27. glifor.mp.                      | 77. or/72-76                                        |
| 28. riomet.mp.                      | 78. selection criteria.ab.                          |
| 29. janumet.mp.                     | 79. data extraction.ab.                             |
| 30. fortamet.mp.                    | 80. 78 or 79                                        |
| 31. obimet.mp.                      | 81. Review/                                         |
| 32. pregnancy.mp.                   | 82. 80 and 81                                       |
| 33. pregnan?.mp.                    | 83. Comment/                                        |
| 34. reproductive.mp.                | 84. Letter/                                         |
| 35. maternal.mp.                    | 85. Editorial/                                      |
| 36. neonatal.mp.                    | 86. animal/                                         |
| 37. gestation?.mp.                  | 87. human/                                          |
| 38. infant.mp.                      | 88. 86 not (86 and 87)                              |
| 39. offspring.mp.                   | 89. or/83-85,88                                     |
| 40. f?etal.mp.                      | 90. 62 or 71 or 77 or 82                            |
| 41. neonat?.mp.                     | 91. 90 not 89                                       |
| 42. ?natal.mp.                      | 92. 53 or 91                                        |
| 43. gestational diabetes.mp.        | 93. 45 and 92                                       |
| 44. GDM.mp.                         | 94. limit 93 to humans                              |
| 45. or/1-44                         | 95. or/1-31                                         |
| 46. randomi?ed controlled trial.pt. | 96. or/32-44                                        |
| 47. controlled clinical trial.pt.   | 97. 95 and 96                                       |
| 48. randomi?ed.ti,ab.               | 98. 92 and 97                                       |
| 49. placebo.ti,ab.                  | 99. limit 98 to humans                              |
| 50. clinical trials as topic.sh.    |                                                     |
